# Supplementary material for: How Big Is Your Y? A Genome Sequence-Based Estimate of the Size of the Male-Specific Region in Megaselia scalaris
Source: PubMed Central journal article supplement (PMC4291468; doi:10.1534/g3.114.015057), 2014-11-07
Supplement: supp_g3.114.015057_015057SI.pdf [file supp_g3.114.015057_015057SI.pdf]

**How big is your Y? A genome-sequence based estimate of the size of the male-specific region in *Megaselia scalaris***

Kenneth B. Hoehn<sup>\*§</sup> and Mohamed A. F. Noor<sup>§</sup>

<sup>\*</sup>Department of Zoology, University of Oxford, Oxford OX1 3PS, United Kingdom

<sup>§</sup>Biology Department, Duke University, Durham, NC 27708

DOI: [10.1534/g3.114.015057](https://doi.org/10.1534/g3.114.015057)

| <b>Page</b> | <b>Contents</b>                                                                   |
|-------------|-----------------------------------------------------------------------------------|
| 2 SI        | Table S1: Summary statistics of <i>Megaselia</i> male assembly                    |
| 3 SI        | Figure S1: <i>Megaselia</i> 15-mers vs contig size                                |
| 4 SI        | Figure S2: <i>Megaselia</i> MSP weighted by minimum contig size and prior weight  |
| 5 SI        | Figure S3: <i>D. virilis</i> MSP weighted by minimum contig size and prior weight |

**Table S1 Assembly statistics from *Megaselia* male genome assembly: Output from SOAPdenov2.**

**Assembly Statistics: *Megaselia* Male**

|                          |           |
|--------------------------|-----------|
| <b>Total Size (bp)</b>   | 453444693 |
| <b>Scaffold Number</b>   | 1755386   |
| <b>Mean Size</b>         | 258       |
| <b>Median Size</b>       | 183       |
| <b>Longest Sequence</b>  | 11221     |
| <b>Shortest Sequence</b> | 100       |
| <b>Singleton Number</b>  | 1755386   |

| <b>Scaffolds &gt; Length (bp)</b> | <b>Number</b> | <b>Percentage</b> |
|-----------------------------------|---------------|-------------------|
| scaffolds>100                     | 1743801       | 99.34%            |
| scaffolds>500                     | 156140        | 8.89%             |
| scaffolds>1K                      | 29777         | 1.70%             |
| scaffolds>10K                     | 2             | 0.00%             |
| scaffolds>100K                    | 0             | 0.00%             |
| scaffolds>1M                      | 0             | 0.00%             |

| <b>Length Quantiles</b> | <b>Length</b> | <b>Number</b> |
|-------------------------|---------------|---------------|
| N10                     | 978           | 31746         |
| N20                     | 643           | 90350         |
| N30                     | 476           | 173071        |
| N40                     | 368           | 281942        |
| N50                     | 292           | 420610        |
| N60                     | 236           | 593838        |
| N70                     | 193           | 806946        |
| N80                     | 160           | 1065221       |
| N90                     | 136           | 1373198       |

| <b>Nucleotide Content</b> | <b>Number</b> | <b>Percentage</b> |
|---------------------------|---------------|-------------------|
| Nucleotide A              | 153644768     | 33.88%            |
| Nucleotide C              | 76208688      | 16.81%            |
| Nucleotide G              | 74994329      | 16.54%            |
| Nucleotide T              | 148596908     | 32.77%            |
| GC Content                | 33.35%        |                   |

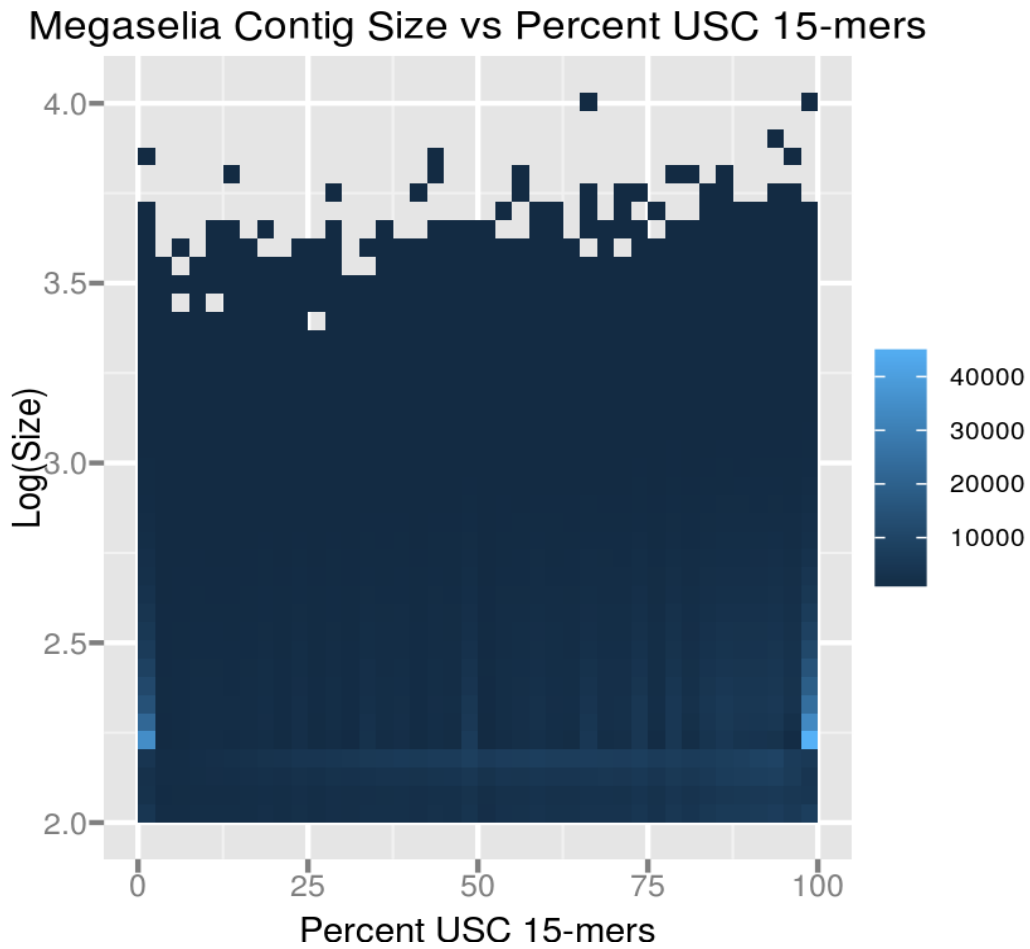

**Figure S1** Heatmap showing count of *Megaselia* 15-mers by  $\log_{10}(\text{Contig Size})$  and percent of single copy 15-mers that were unmatched (USC) by female short read data. Note peaks at 0% USC and 100% USC 15-mers. These are inferred to be caused by autosomal vs. male-specific contigs, respectively.

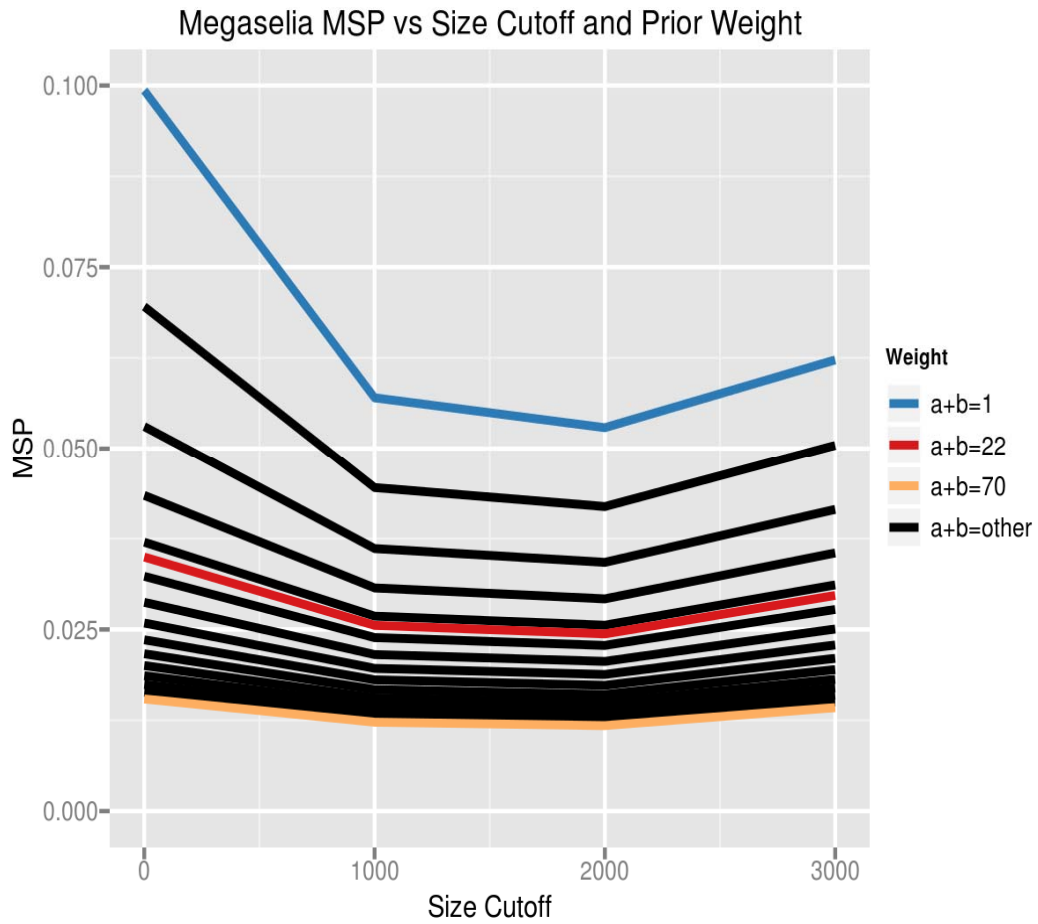

**Figure S2** Estimates of male specific portion (MSP) of *M. scalaris* by minimum contig size and prior weight (a+b). The least stringent estimate (a+b=1), median estimate (a+b=22), and most stringent estimate (a+b=70) are colored. Prior weight values are otherwise selected in intervals of 5.

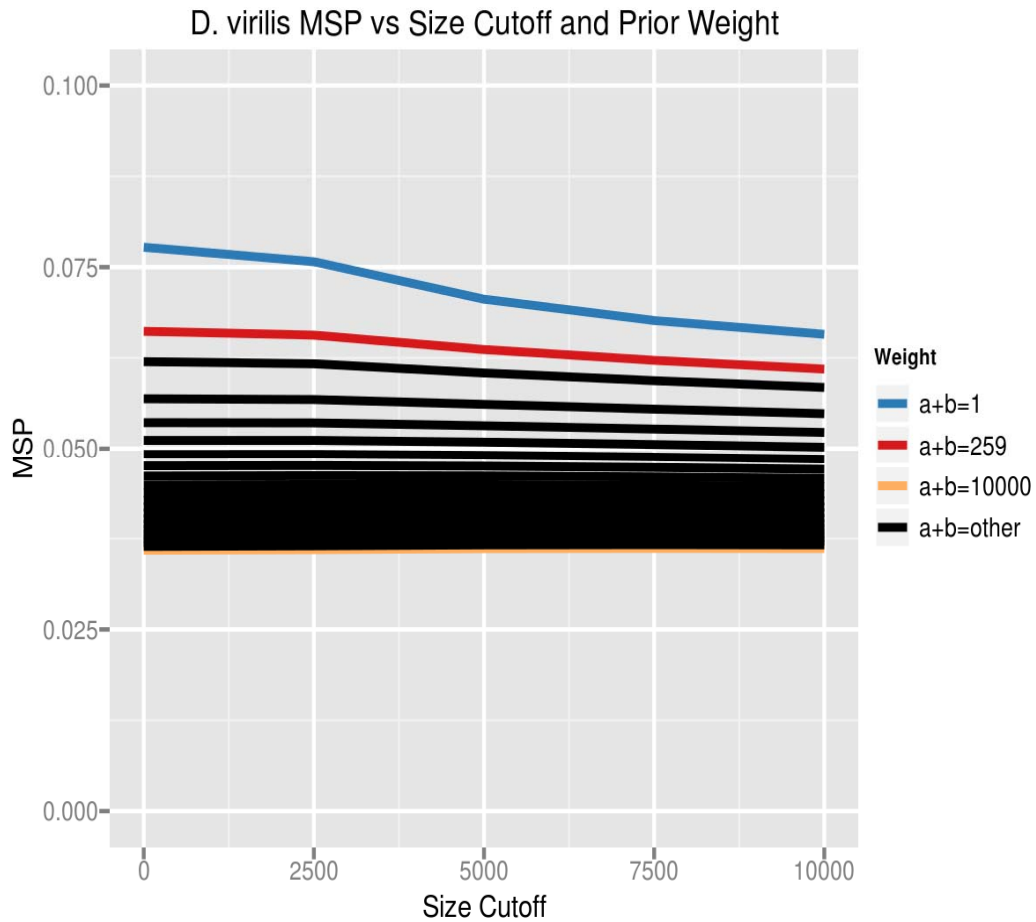

**Figure S3** Estimates of male specific portion (MSP) of *D. virilis* by minimum contig size and prior weight (a+b). The least stringent estimate (a+b=1), median estimate (a+b=259), and most stringent estimate (a+b=10000) are colored. Prior weight values are otherwise selected in intervals of 500. These values are much higher than in the *Megaselia* estimation because the contigs of the *D. virilis* assembly are much larger (median contig size of 189 vs 4605, respectively).
