# Supplementary material for: How Big Is Your Y? A Genome Sequence-Based Estimate of the Size of the Male-Specific Region in Megaselia scalaris
Source: PubMed Central journal article supplement (PMC4291468; doi:10.1534/g3.114.015057), 2014-11-07
Supplement: supp_g3.114.015057_FigureS1.pdf [file supp_g3.114.015057_FigureS1.pdf]

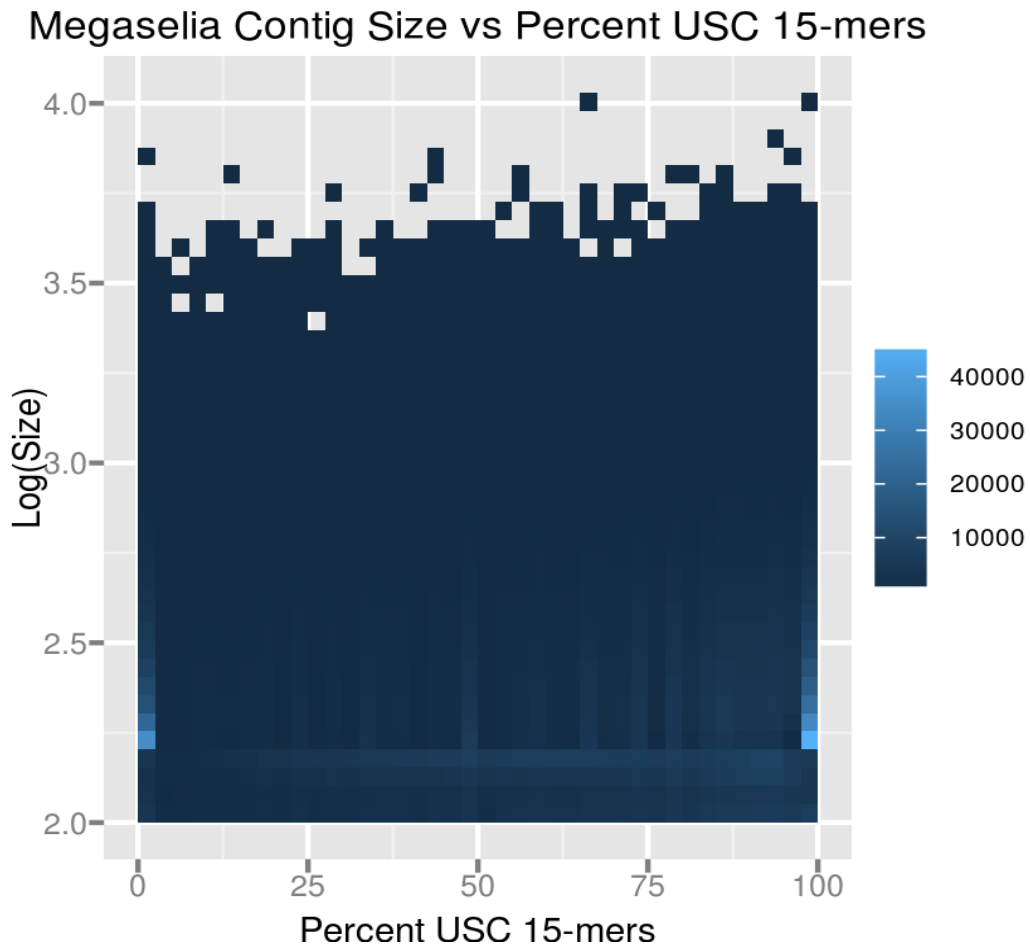

**Figure S1** Heatmap showing count of *Megaselia* 15-mers by  $\log_{10}(\text{Contig Size})$  and percent of single copy 15-mers that were unmatched (USC) by female short read data. Note peaks at 0% USC and 100% USC 15-mers. These are inferred to be caused by autosomal vs. male-specific contigs, respectively.
