# Supplementary material for: How Big Is Your Y? A Genome Sequence-Based Estimate of the Size of the Male-Specific Region in Megaselia scalaris
Source: PubMed Central journal article supplement (PMC4291468; doi:10.1534/g3.114.015057), 2014-11-07
Supplement: supp_g3.114.015057_FigureS2.pdf [file supp_g3.114.015057_FigureS2.pdf]

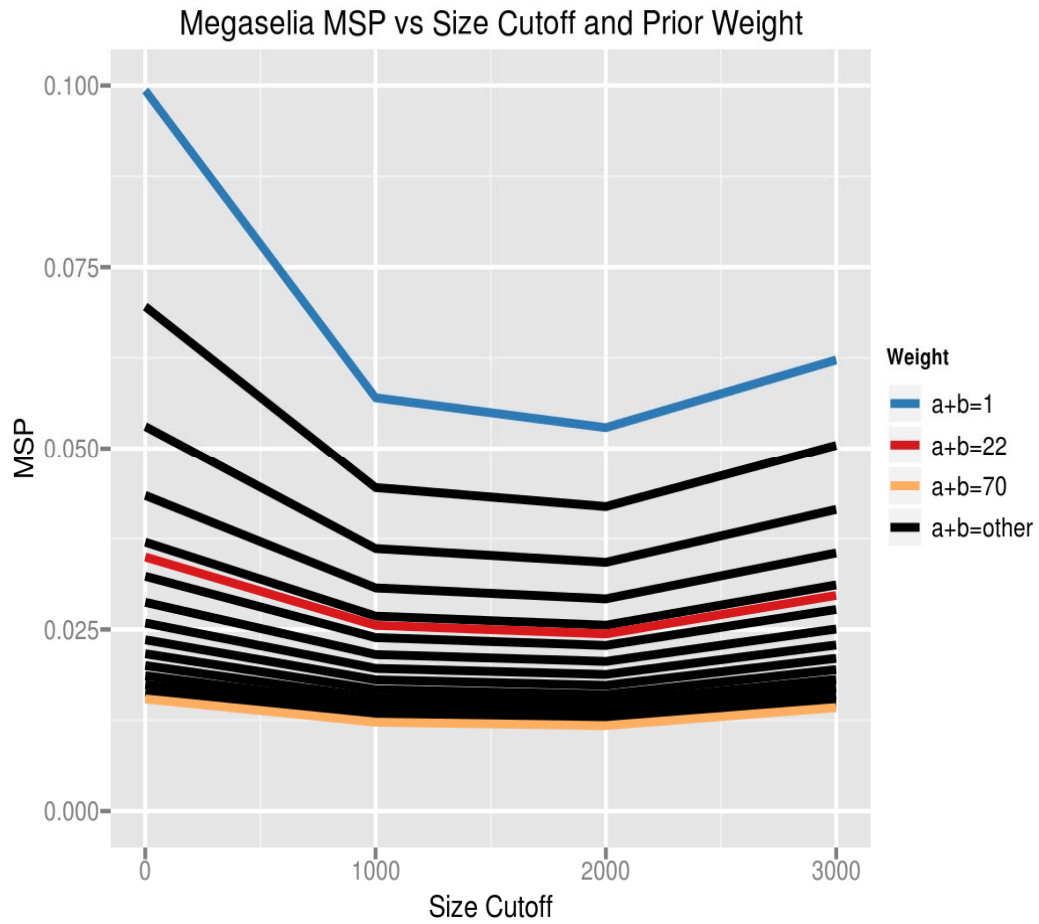

**Figure S2** Estimates of male specific portion (MSP) of *M. scalaris* by minimum contig size and prior weight ( $a+b$ ). The least stringent estimate ( $a+b=1$ ), median estimate ( $a+b=22$ ), and most stringent estimate ( $a+b=70$ ) are colored. Prior weight values are otherwise selected in intervals of 5.
