# Supplementary material for: How Big Is Your Y? A Genome Sequence-Based Estimate of the Size of the Male-Specific Region in Megaselia scalaris
Source: PubMed Central journal article supplement (PMC4291468; doi:10.1534/g3.114.015057), 2014-11-07
Supplement: supp_g3.114.015057_TableS1.pdf [file supp_g3.114.015057_TableS1.pdf]

**Table S1 Assembly statistics from *Megaselia* male genome assembly: Output from SOAPdenov2.**

**Assembly Statistics: *Megaselia* Male**

|                          |           |
|--------------------------|-----------|
| <b>Total Size (bp)</b>   | 453444693 |
| <b>Scaffold Number</b>   | 1755386   |
| <b>Mean Size</b>         | 258       |
| <b>Median Size</b>       | 183       |
| <b>Longest Sequence</b>  | 11221     |
| <b>Shortest Sequence</b> | 100       |
| <b>Singleton Number</b>  | 1755386   |

| <b>Scaffolds &gt; Length (bp)</b> | <b>Number</b> | <b>Percentage</b> |
|-----------------------------------|---------------|-------------------|
| scaffolds>100                     | 1743801       | 99.34%            |
| scaffolds>500                     | 156140        | 8.89%             |
| scaffolds>1K                      | 29777         | 1.70%             |
| scaffolds>10K                     | 2             | 0.00%             |
| scaffolds>100K                    | 0             | 0.00%             |
| scaffolds>1M                      | 0             | 0.00%             |

| <b>Length Quantiles</b> | <b>Length</b> | <b>Number</b> |
|-------------------------|---------------|---------------|
| N10                     | 978           | 31746         |
| N20                     | 643           | 90350         |
| N30                     | 476           | 173071        |
| N40                     | 368           | 281942        |
| N50                     | 292           | 420610        |
| N60                     | 236           | 593838        |
| N70                     | 193           | 806946        |
| N80                     | 160           | 1065221       |
| N90                     | 136           | 1373198       |

| <b>Nucleotide Content</b> | <b>Number</b> | <b>Percentage</b> |
|---------------------------|---------------|-------------------|
| Nucleotide A              | 153644768     | 33.88%            |
| Nucleotide C              | 76208688      | 16.81%            |
| Nucleotide G              | 74994329      | 16.54%            |
| Nucleotide T              | 148596908     | 32.77%            |
| GC Content                | 33.35%        |                   |
